# Supplementary material
Source: ML conference proceedings conference paper supplement (https://proceedings.neurips.cc/paper_files/paper/2016/hash/51ef186e18dc00c2d31982567235c559-Abstract.html)
Supplement: Supplementary file [file 51ef186e18dc00c2d31982567235c559-Supplemental.zip]

## A Properties of $\hat{\theta}_k(t)$ (Section 2)

Conditionnally to the actions  $A(1)$  up to  $A(t-1)$ , the log-likelihood of the observations  $Z(1), \dots, Z(t-1)$  may be written as

$$\begin{aligned} \sum_{s=1}^{t-1} \sum_{k=1}^K \sum_{l=1}^L \mathbb{1}\{A_l(s) = k\} [Z_l(s) \log(\kappa_l \theta_k) + (1 - Z_l(s)) \log(1 - \kappa_l \theta_k)] \\ = \sum_{k=1}^K \sum_{l=1}^L S_{k,l}(t) \log(\kappa_l \theta_k) + (N_{k,l}(t) - S_{k,l}(t)) \log(1 - \kappa_l \theta_k). \end{aligned}$$

Differentiating twice with respect to  $\theta_k$  and taking the expectation of  $(S_{k,l}(t))_l$ , contional to  $A(1), \dots, A(t-1)$ , yields the expression of  $I(\theta_k)$  given in Section 2.

## B Proof of Theorem 4

### B.1 Proof of Lemma 2

Under the PBM, the conditional expectation of the log-likelihood ratio defined in (4) writes

$$\begin{aligned} \mathbb{E}_\theta[\ell(t)|A(1), \dots, A(t)] &= \mathbb{E}_\theta \left[ \sum_{s=1}^t \sum_{a \in \mathcal{A}} \mathbb{1}\{A(s) = a\} \sum_{l=1}^L \log \frac{p_{a_l}(X_l(s)Y_l(s); \theta)}{p_{a_l}(X_l(s)Y_l(s); \lambda)} \middle| A(1), \dots, A(t) \right] \\ &= \sum_{s=1}^t \sum_{a \in \mathcal{A}} \mathbb{1}\{A(s) = a\} \sum_{l=1}^L \mathbb{E} \left[ \log \frac{p_{a_l}(X_l(s)Y_l(s); \theta)}{p_{a_l}(X_l(s)Y_l(s); \lambda)} \middle| A(s) = a \right] \\ &= \sum_{a \in \mathcal{A}} N_a(t) \sum_{l=1}^L \sum_{k=1}^K \mathbb{1}\{a_l = k\} d(\kappa_l \theta_k, \kappa_l \lambda_k) \\ &= \sum_{a \in \mathcal{A}} N_a(t) I_a(\theta, \lambda), \end{aligned}$$

using the notation  $I_a(\theta, \lambda) = \sum_{l=1}^L \sum_{k=1}^K \mathbb{1}\{a_l = k\} d(\kappa_l \theta_k, \kappa_l \lambda_k)$ . □

### B.2 Details on the proof of Proposition 3

**Lemma 12.** *Let  $\theta = (\theta_1, \dots, \theta_K)$  and  $\lambda = (\lambda_1, \dots, \lambda_K)$  be two bandit models such that the distributions of all arms in  $\theta$  and  $\lambda$  are mutually absolutely continuous. Let  $\sigma$  be a stopping time with respect to  $(\mathcal{F}_t)$  such that  $(\sigma < +\infty)$  a.s. under both models. Let  $\mathcal{E} \in \mathcal{F}_\sigma$  be an event such that  $0 < \mathbb{P}_\theta(\mathcal{E}) < 1$ . Then one has*

$$\sum_{a \in \mathcal{A}} I_a(\theta, \lambda) \mathbb{E}_\theta[N_a(\sigma)] \geq d(\mathbb{P}_\theta(\mathcal{E}), \mathbb{P}_\lambda(\mathcal{E})),$$

where  $I_a(\theta, \lambda)$  is the conditional expectation of the log-likelihood ratio for the model of interest.

The proof of this lemma directly follows from the above expressions of the log-likelihood ratio and from the proof of Lemma 1 in Appendix A.1 of [12].

We simply recall the following technical lemma for completeness.

**Lemma 13.** *Let  $\sigma$  be any stopping time with respect to  $(\mathcal{F}_t)$ . For every event  $A \in \mathcal{F}_\sigma$ ,*

$$\mathbb{P}_\lambda(A) = \mathbb{E}_\theta[\mathbb{1}\{A\} \exp(-\ell(\sigma))].$$

A full proof of Lemma 13 can be found in the Appendix A.3 of [12] (proof of Lemma 15).

### B.3 Lower bound proof (Theorem 4)

In order to prove the simplified lower bound of Theorem 4 we basically have two arguments:

1. a lower bound on  $f(\theta)$  can be obtained by enlarging the feasible set, that is by relaxing some constraints;
2. Lemma 15 can be used to lower bound the objective function of the problem.

The constant  $f(\theta)$  is defined by

$$f(\theta) = \inf_{c \succeq 0} \sum_{a \neq a^*(\theta)} \Delta_a(\theta) c_a \quad (8)$$

$$s.t. \inf_{\lambda \in B(\theta)} \sum_{a \in \mathcal{A}} I_a(\theta, \lambda) c_a \geq 1. \quad (9)$$

We begin by relaxing some constraints: we only allow the change of measure  $\lambda$  to belong to the sets  $B_k(\theta) := \{\lambda \in \Theta | \forall j \neq k, \theta_j = \lambda_j \text{ and } \mu^*(\theta) < \mu^*(\lambda)\}$  defined in Section 3:

$$f(\theta) = \inf_{c \succeq 0} \sum_{a \neq a^*(\theta)} \Delta_a(\theta) c_a \quad (10)$$

$$s.t. \forall k \notin a^*(\theta), \forall \lambda \in B_k(\theta), \sum_{a \in \mathcal{A}} I_a(\theta, \lambda) c_a \geq 1. \quad (11)$$

The  $K - L$  constraints (11) only let one parameter move and must be true for any value satisfying the definition of the corresponding set  $B_k(\theta)$ . In practice, for each  $k$ , the parameter  $\lambda_k$  must be set to at least  $\theta_L$ . Consequently, these constraints may then be rewritten

$$f(\theta) = \inf_{c \succeq 0} \sum_{a \neq a^*(\theta)} \Delta_a(\theta) c_a \quad (12)$$

$$s.t. \forall k \notin a^*(\theta), \sum_{a \neq a^*(\theta)} c_a \sum_{l=1}^L \mathbb{1}\{a_l = k\} d(\kappa_l \theta_k, \kappa_l \theta_L) \geq 1. \quad (13)$$

Proposition 14 tells us that coefficients  $c_a$  are all zeros except for actions  $a \in \mathcal{A}$  which can be written  $a = v_{k, l_k}$  where  $l_k = \arg \min_{l \leq L} \frac{\Delta_{v_{k, l}}(\theta)}{d(\kappa_l \theta_k, \kappa_l \theta_L)}$ . Thus, we obtain the desired lower bound by rewriting (12) as

$$f(\theta) \geq \sum_{k=L+1}^K \min_{l \in \{1, \dots, L\}} \frac{\Delta_{v_{k, l}}(\theta)}{d(\kappa_l \theta_k, \kappa_l \theta_L)}.$$

□

**Proposition 14.** Let  $c = \{c_a : a \neq a^*\}$  be a solution of the linear problem (LP) in Theorem 4. Coefficients are all zeros except for actions  $a$  which can be written as  $a = (1, \dots, l_k - 1, k, l_k, \dots, L - 1) := v_{k, l_k}$  where  $k > L$  and  $l_k = \arg \min_{l \leq L} \frac{\Delta_{v_{k, l}}(\theta)}{d(\kappa_l \theta_k, \kappa_l \theta_L)}$ .

*Proof.* We denote by  $\pi_k(a)$  the position of item  $k \in \{1, \dots, K\}$  in action  $a$  (0 if  $k \notin a$ ). Let  $l_k$  be the optimal position of item  $k > L$  for exploration:  $l_k = \arg \min_{l \leq L} \frac{\Delta_{v_{k, l}}(\theta)}{d(\kappa_l \theta_k, \kappa_l \theta_L)}$ . Following [6], we show by contradiction that  $c_a > 0$  implies that  $a$  can be written  $v_{k, l_k}$  for a well chosen  $k > L$ . Let  $\alpha \neq a^*$  be a suboptimal action such that  $\forall k > L, \alpha \neq v_{k, l_k}$  and  $c_\alpha > 0$ . We need to show a contradiction. Let us introduce a new set of coefficients  $c'$  defined as follows, for any  $a \neq a^*$ :

$$c'_a = \begin{cases} 0 & \text{if } a = \alpha \\ c_a + \frac{d(\kappa_{\pi_k(\alpha)} \theta_k, \kappa_{\pi_k(\alpha)} \theta_L)}{d(\kappa_{l_k} \theta_k, \kappa_{l_k} \theta_L)} c_\alpha & \text{if } \exists k > L \text{ s.t. } a = v_{k, l_k} \text{ and } k \in \alpha \\ c_a & \text{otherwise.} \end{cases}$$

According to Lemma 15, these coefficients satisfy the constraints of the LP. We now show that these new coefficients yield a strictly lower value to the optimization problem:

$$\begin{aligned} c(\theta) - c'(\theta) &= c_\alpha \Delta_\alpha(\theta) - \sum_{k>L: k \in \alpha} \frac{d(\kappa_{\pi_k(\alpha)} \theta_k, \kappa_{\pi_k(\alpha)} \theta_L)}{d(\kappa_{l_k} \theta_k, \kappa_{l_k} \theta_L)} c_\alpha \Delta_{v_{k, l_k}}(\theta) \\ &> c_\alpha \left( \sum_{k>L: k \in \alpha} \Delta_{v_{k, \pi_k(\alpha)}}(\theta) - \sum_{k>L: k \in \alpha} \frac{d(\kappa_{\pi_k(\alpha)} \theta_k, \kappa_{\pi_k(\alpha)} \theta_L)}{d(\kappa_{l_k} \theta_k, \kappa_{l_k} \theta_L)} \Delta_{v_{k, l_k}}(\theta) \right). \end{aligned} \quad (14)$$

The strict inequality (14) is shown in Lemma 16. Let  $k > L$  be one of the suboptimal arms in  $\alpha$ . By definition of  $l_k$ , the corresponding term of the sum in equation (14) is positive. Thus, we have that  $c(\theta) > c'(\theta)$  and, hence, by contradiction, we showed that  $c_a > 0$  iff  $a$  can be written  $a = v_{k, l_k}$  for some  $k > L$ .  $\square$

**Lemma 15.** *Let  $c$  be a vector of coefficients that satisfy constraints (13) of the optimization problem. Then, coefficients  $c'$  as defined in Proposition 14 also satisfy the constraints:*

$$\forall k \notin a^*(\theta), \sum_{a \neq a^*(\theta)} c'_a \sum_{l=1}^L \mathbb{1}\{a_l = k\} d(\kappa_l \theta_k, \kappa_l \theta_L) \geq 1.$$

*Proof.* We use the same  $\alpha$  as introduced in Proposition 14. Let us fix  $k \notin a^*(\theta)$ . Let us define

$$L(c) = \sum_{a \neq a^*(\theta)} c_a \sum_{l=1}^L \mathbb{1}\{a_l = k\} d(\kappa_l \theta_k, \kappa_l \theta_L).$$

We have

$$\begin{aligned} L(c') - L(c) &= -c_\alpha \sum_{l=1}^L \mathbb{1}\{\alpha_l = k\} d(\kappa_l \theta_k, \kappa_l \theta_L) + \sum_{l: \alpha_l > L} \frac{d(\kappa_l \theta_k, \kappa_l \theta_L)}{d(\kappa_{l_k} \theta_k, \kappa_{l_k} \theta_L)} c_\alpha \\ &\quad \times \mathbb{1}\{\alpha_l = k\} d(\kappa_{l_k} \theta_k, \kappa_{l_k} \theta_L). \end{aligned}$$

If  $k \notin \alpha$ , clearly,  $L(c') - L(c) = 0$ . Else,  $k \in \alpha$  and we note  $p$  its position in  $\alpha$ :  $p = \pi_k(\alpha)$ . We rewrite:

$$L(c') - L(c) = c_\alpha d(\kappa_p \theta_k, \kappa_p \theta_L) \left( -1 + \frac{d(\kappa_{l_k} \theta_k, \kappa_{l_k} \theta_L)}{d(\kappa_{l_k} \theta_k, \kappa_{l_k} \theta_L)} \right) = 0.$$

Thus, the coefficients  $c'$  satisfy the constraints from Proposition 14.  $\square$

**Lemma 16.** *Let  $\alpha$  be as in the proof of Proposition 14.*

$$\Delta_\alpha(\theta) > \sum_{k>L: k \in \alpha} \Delta_{v_{k, \pi_k(\alpha)}}(\theta).$$

*Proof.* Let  $k_1, \dots, k_p$  be the suboptimal arms in  $\alpha$  by increasing position. Let  $v(\alpha)$  be the action in  $\mathcal{A}$  with lower regret such that it contains all the suboptimal arms of  $\alpha$  in the same positions. Thus,  $v(\alpha) = (1, \dots, \pi_{k_1}(\alpha) - 1, k_1, \pi_{k_1}(\alpha), \dots, \pi_{k_2}(\alpha) - 2, k_2, \pi_{k_2}(\alpha) - 1, \dots, L - p)$ . By definition, one has that  $\Delta_\alpha(\theta) \geq \Delta_{v(\alpha)}(\theta)$ . In the following, we show that  $\Delta_{v(\alpha)}(\theta) \geq \sum_{k>L: k \in \alpha} \Delta_{v_{k, \pi_k(\alpha)}}(\theta)$  for  $p = 2$  (that is to say  $\alpha$  contains 2 suboptimal arms  $k_1$  and  $k_2$ ).

For the sake of readability, we write  $\pi_i$  instead of  $\pi_{k_i}(\alpha)$  in the following.

$$\begin{aligned} \Delta_{v(\alpha)}(\theta) &= \sum_{l=1}^L \kappa_l (\theta_l - \theta_{(v_{k_1, \pi_1})_l}) + \sum_{l=1}^L \kappa_l (\theta_{(v_{k_1, \pi_1})_l} - \theta_{v(\alpha)_l}) \\ &= \Delta_{v_{k_1, \pi_1}}(\theta) + [\kappa_{\pi_2} \theta_{\pi_2-1} + \dots + \kappa_L \theta_{L-1}] - [\kappa_{\pi_2} \theta_{k_2} + \kappa_{\pi_2+1} \theta_{\pi_2-1} + \dots + \kappa_L \theta_{L-2}] \\ &= \Delta_{v_{k_1, \pi_1}}(\theta) + \Delta_{v_{k_2, \pi_2}}(\theta) + [\kappa_{\pi_2} (\theta_{\pi_2-1} - \theta_{\pi_2}) + \dots + \kappa_L (\theta_{L-1} - \theta_L)] - \\ &\quad [\kappa_{\pi_2+1} (\theta_{\pi_2-1} - \theta_{\pi_2}) + \dots + \kappa_L (\theta_{L-2} - \theta_{L-1})] \\ &= \Delta_{v_{k_1, \pi_1}}(\theta) + \Delta_{v_{k_2, \pi_2}}(\theta) + \mathcal{R}(\theta). \end{aligned}$$

Thus, one has to show that  $\mathcal{R}(\theta) = \kappa_{\pi_2}(\theta_{\pi_2-1} - \theta_{\pi_2}) + \kappa_{\pi_2+1}(2\theta_{\pi_2} - \theta_{\pi_2-1} - \theta_{\pi_2+1}) + \dots + \kappa_L(2\theta_{L-1} - \theta_{L-2} - \theta_L) > 0$ . In fact, using that  $\kappa_l \geq \kappa_{l+1}$  for all  $l < L$ , we have

$$\begin{aligned}\mathcal{R}(\theta) &\geq \kappa_{\pi_2+1}(\theta_{\pi_2-1} - \theta_{\pi_2} + 2\theta_{\pi_2} - \theta_{\pi_2-1} - \theta_{\pi_2+1}) + \dots + \kappa_L(2\theta_{L-1} - \theta_{L-2} - \theta_L) \\ &\geq \kappa_{\pi_2+2}(\theta_{\pi_2+1} - \theta_{\pi_2+2}) + \dots + \kappa_L(2\theta_{L-1} - \theta_{L-2} - \theta_L) \\ &\geq \dots \\ &\geq \kappa_L(\theta_{L-1} - \theta_L) \\ &> 0.\end{aligned}$$

□

## C Proof of Proposition 8

In this section, we fix an arm  $k \in \{1, \dots, K\}$  and obtain an upper confidence bound for the estimator  $\hat{\theta}_k(t) := S_k(t)/\tilde{N}_k(t)$ . Let  $\tau_i$  be the instant of the  $i$ -th draw of arm  $k$  (the  $\tau_i$  are stopping times w.r.t.  $\mathcal{F}_t$ ). We introduce the centered sequence of successive observations from arm  $k$

$$\bar{Z}_{k,i} = \sum_{l=1}^L \mathbb{1}\{A_l(\tau_i) = k\} (X_l(\tau_i)Y_l(\tau_i) - \theta_k \kappa_l). \quad (15)$$

Introducing the filtration  $\mathcal{G}_i = \mathcal{F}_{\tau_{i+1}-1}$ , one has  $\mathbb{E}[\bar{Z}_{k,i}|\mathcal{G}_{i-1}] = 0$ , and therefore, the sequence

$$M_{k,n} = \sum_{i=1}^n \bar{Z}_{k,i}$$

is a martingale with bounded increments, w.r.t. the filtration  $(\mathcal{G}_n)_n$ . By construction, one has

$$M_{k,N_k(t)} = S_k(t) - \tilde{N}_k(t)\theta_k = \tilde{N}_k(t)(\hat{\theta}_k(t) - \theta_k).$$

We use the so-called peeling technique together with the maximal version of Azuma-Hoeffding's inequality [3]. For any  $\gamma > 0$  one has

$$\begin{aligned}\mathbb{P}\left(M_{k,N_k(t)} < -\sqrt{N_k(t)\delta/2}\right) &\leq \sum_{i=1}^{\frac{\log(t)}{\log(1+\gamma)}} \mathbb{P}\left(M_{k,N_k(t)} < -\sqrt{N_k(t)\delta/2}, N_k(t) \in [(1+\gamma)^{i-1}, (1+\gamma)^i)\right) \\ &\leq \sum_{i=1}^{\frac{\log(t)}{\log(1+\gamma)}} \mathbb{P}\left(\exists i \in \{1, \dots, (1+\gamma)^i\} : M_{k,i} < -\sqrt{(1+\gamma)^{i-1}\delta/2}\right) \\ &\leq \sum_{i=1}^{\frac{\log(t)}{\log(1+\gamma)}} \exp\left(-\frac{\delta(1+\gamma)^{i-1}}{(1+\gamma)^i}\right) = \frac{\log(t)}{\log(1+\gamma)} \exp\left(-\frac{\delta}{(1+\gamma)}\right).\end{aligned}$$

Choosing  $\gamma = 1/(\delta - 1)$ , gives

$$\mathbb{P}\left(\hat{\theta}_k(t) - \theta_k < -\frac{\sqrt{N_k(t)\delta/2}}{\tilde{N}_k(t)}\right) \leq \delta e \log(t) e^{-\delta}.$$

## D Regret analysis for PBM-UCB (Theorem 9)

We proceed as Kveton et al. (2015) [15]. We start by considering separately rounds when one of the confidence intervals is violated. We denote by  $B_{t,k} = \sqrt{N_k(t)(1+\epsilon)\log t/2}/\tilde{N}_k(t)$  the PBM-UCB exploration bonus and by  $B_{t,k}^+ = \sqrt{N_k(t)(1+\epsilon)\log T/2}/\tilde{N}_k(t)$  an upper bound of this bonus (for  $t \leq T$ ). We define the event  $E_t = \{\exists k \in A(t) : |\hat{\theta}_k(t) - \theta_k| > B_{t,k}\}$ . Then, the regret can be decomposed into

$$R(T) = \sum_{t=1}^T \Delta_{A(t)} \mathbb{1}_{E_t} + \Delta_{A(t)} \mathbb{1}_{\bar{E}_t}.$$

and, similarly to [15] (Appendix A.1), the first term of this sum can be bounded from above in expectation by a constant  $C_0(\epsilon)$  that does not depend on  $T$  using Proposition 8. So, it remains to bound the regret suffered even when confidence intervals are respected, that is the sum on the r.h.s of

$$\mathbb{E}[R(T)] < C_0(\epsilon) + \mathbb{E}\left[\sum_{t=1}^T \Delta_{A(t)} \mathbb{1}\{\bar{E}_t, \Delta_{A(t)} > 0\}\right].$$

It can be done using techniques from [7, 15]. We start by defining events  $F_t, G_t, H_t$  in order to decompose the part of the regret at stake. Then, we show an equivalent of Lemma 2 of [15] for our case and finally we refer to the proof of Theorem 3 in Appendix A.3 of [15].

For each round  $t \geq 1$ , we define the set of arms  $S_t = \{1 \leq l \leq L : N_{A_l(t)}(t) \leq \frac{8(1+\epsilon) \log T (\sum_{s=1}^L \kappa_s)^2}{\kappa_L^2 \Delta_{A(t)}^2}\}$  and the related events

- $F_t = \{\Delta_{A(t)} > 0, \Delta_{A(t)} \leq 2 \sum_{l=1}^L \kappa_l B_{t,A_l(t)}^+\};$
- $G_t = \{|S_t| \geq l\};$
- $H_t = \{|S_t| < l, \exists k \in A(t), N_k(t) \leq \frac{8(1+\epsilon) \log T (\sum_{s=1}^l \kappa_s)^2}{\kappa_L^2 \Delta_{A(t)}^2}\}$ , where the constraint on  $N_k(t)$  only differs from the first one by its numerator which is smaller than the previous one, leading to an even stronger constraint.

**Fact 17.** According to Lemma 1 in [15], the following inequality is still valid with our own definition of  $F_t$ :

$$\sum_{t=1}^T \Delta_{A(t)} \mathbb{1}\{\bar{E}_t, \Delta_{A(t)} > 0\} \leq \sum_{t=1}^T \Delta_{A(t)} \mathbb{1}\{F_t\}.$$

*Proof.* Invoking Lemma 1 from [15] needs to be justified as our setting is quite different. Taking action  $A(t)$  means that

$$\sum_{l=1}^L \kappa_l U_{A_l(t)}(t) \geq \sum_{l=1}^L \kappa_l U_l(t).$$

Under event  $\bar{E}_t$ , all UCB's are above the true parameter  $\theta_k$  so we have

$$\sum_{l=1}^L \kappa_l (\theta_{A_l(t)} + 2B_{t,A_l(t)}) \geq \sum_{l=1}^L \kappa_l (\theta_l + B_{t,l}) \geq \sum_{l=1}^L \kappa_l \theta_l.$$

Rearranging the terms above and using  $B_{t,l(t)} \leq B_{t,l(t)}^+$ , we obtain

$$\sum_{l=1}^L \kappa_l B_{t,A_l(t)}^+ \geq 2 \sum_{l=1}^L \kappa_l B_{t,A_l(t)} \geq \Delta_{A(t)}.$$

□

We now have to prove an equivalent of Lemma 2 in [7] that would allow us to split the right-hand side above in two parts. Let us show that  $F_t \subset (G_t \cup H_t)$  by showing its contrapositive: if  $F_t$  is true then we cannot have  $(\bar{G}_t \cap \bar{H}_t)$ . Assume both of these events are true. Then, we have

$$\begin{aligned} \Delta_{A(t)} &\stackrel{F_t}{\leq} 2 \sum_{l=1}^L \kappa_l B_{t,A_l(t)}^+ \\ &\leq 2 \sum_{l=1}^L \kappa_l \sqrt{\frac{N_{A_l(t)}(t)}{\tilde{N}_{A_l(t)}(t)}} \sqrt{\frac{(1+\epsilon) \log(T)}{2\tilde{N}_{A_l(t)}(t)}} \\ &= 2 \sum_{l=1}^L \kappa_l \frac{N_{A_l(t)}(t)}{\tilde{N}_{A_l(t)}(t)} \sqrt{\frac{(1+\epsilon) \log(T)}{2N_{A_l(t)}(t)}} \end{aligned}$$

$$\begin{aligned}
&\leq \frac{\sqrt{2(1+\epsilon)\log T}}{\kappa_L} \sum_{l=1}^L \frac{\kappa_l}{\sqrt{N_{A_l(t)}(t)}} \\
&= \frac{\sqrt{2(1+\epsilon)\log T}}{\kappa_L} \left( \sum_{l \notin S_t} \frac{\kappa_l}{\sqrt{N_{A_l(t)}(t)}} + \sum_{l \in S_t} \frac{\kappa_l}{\sqrt{N_{A_l(t)}(t)}} \right) \\
&\stackrel{(\bar{G}_t \cap \bar{H}_t)}{<} \frac{\sqrt{2(1+\epsilon)\log T}}{\kappa_L} \frac{\kappa_L \Delta_{A(t)}}{2\sqrt{2(1+\epsilon)\log T}} \left( \frac{\sum_{l \notin S_t} \kappa_l}{\sum_{s=1}^L \kappa_s} + \frac{\sum_{l \in S_t} \kappa_l}{\sum_{s=1}^L \kappa_s} \right) \\
&\leq \Delta_{A(t)}
\end{aligned}$$

which is a contradiction. The end of the proof proceeds exactly as in the end of the proof of Theorem 6 in of [7]: events  $G_t$  and  $H_t$  are split into subevents corresponding to rounds where each specific suboptimal arm of the list is in  $S_t$  or verifies the condition of  $H_t$ . We define

$$\begin{aligned}
G_{k,t} &= G_t \cap \{k \in A(t), N_k(t) \leq \frac{8(1+\epsilon)\log T \left(\sum_{s=1}^L \kappa_s\right)^2}{\kappa_L^2 \Delta_{A(t)}^2}\}, \\
H_{k,t} &= H_t \cap \{k \in A(t), N_k(t) \leq \frac{8(1+\epsilon)\log T \left(\sum_{s=1}^L \kappa_s\right)^2}{\kappa_L^2 \Delta_{A(t)}^2}\}.
\end{aligned}$$

The way we defined these subevents allows to write the two following bounds :

$$\sum_{k=1}^K \mathbb{1}\{G_{k,t}\} = \mathbb{1}\{G_t\} \sum_{k=1}^K \mathbb{1}\{k \in S_t\} \geq l \mathbb{1}\{G_t\}$$

so  $\mathbb{1}\{G_t\} \leq \sum_k \mathbb{1}\{G_{k,t}\}/l$ . And,

$$\mathbb{1}\{H_t\} \leq \sum_{k=1}^K \mathbb{1}\{H_{k,t}\}.$$

We can now bound the regret using these two results:

$$\begin{aligned}
\sum_{t=1}^T \Delta_{A(t)} (\mathbb{1}\{G_t\} + \mathbb{1}\{H_t\}) &\leq \sum_{t=1}^T \sum_{k=1}^K \frac{\Delta_{A(t)}}{l} \mathbb{1}\{G_{k,t}\} + \sum_{t=1}^T \sum_{k=1}^K \Delta_{A(t)} \mathbb{1}\{H_{k,t}\} \\
&= \sum_{t=1}^T \sum_{k=1}^K \frac{\Delta_{A(t)}}{l} \mathbb{1}\{G_{k,t}, A(t) \neq a^*\} + \sum_{t=1}^T \sum_{k=1}^K \Delta_{A(t)} \mathbb{1}\{H_{k,t}, A(t) \neq a^*\}.
\end{aligned}$$

For each arm  $k$ , there is a finite number  $C_k := |\mathcal{A}_k|$  of actions in  $\mathcal{A}$  containing  $k$ ; we order them such that the corresponding gaps are in decreasing order  $\Delta_{k,1} \geq \dots \geq \Delta_{k,C_k} > 0$ . So we decompose each sum above on the different actions  $A(t)$  possible:

$$\dots \leq \sum_{t=1}^T \sum_{k=1}^K \sum_{a \in \mathcal{A}_k} \frac{\Delta_{k,a}}{l} \mathbb{1}\{G_{k,t}, A(t) = a\} + \sum_{t=1}^T \sum_{k=1}^K \sum_{a \in \mathcal{A}_k} \Delta_{k,a} \mathbb{1}\{H_{k,t}, A(t) = a\}.$$

The two sums on the right hand side look alike. For arm  $k$  fixed, events  $G_{k,t}$  and  $H_{k,t}$  imply almost the same condition on  $N_k(t)$ , only  $H_{k,t}$  is stronger because the bounding term is smaller. We now rely on a technical result by [7] that allows to bound each sum.

**Lemma 18.** ([7], Lemma 2 in Appendix B.4) *Let  $k$  be a fixed item and  $|\mathcal{A}_k| \geq 1$ ,  $C > 0$ , we have*

$$\sum_{t=1}^T \sum_{a \in \mathcal{A}_k} \mathbb{1}\{k \in A(t), N_k(t) \leq C/\Delta_{k,a}^2, A(t) = a\} \Delta_{k,a} \leq \frac{2C}{\Delta_{\min,k}}$$

where  $\Delta_{\min,k}$  is the smallest gap among all suboptimal actions containing arm  $k$ . In particular, when  $k \notin a^*$  the smallest gap is  $\Delta_{\min,k} = \kappa_L(\theta_L - \theta_k)$ . While, when  $k \in a^*$  it is less obvious what the minimal gap is, however it corresponds the second best action  $A_2$  containing only optimal arms:  $\Delta_{\min,k} = \Delta_{A_2}$ .

So, bounding each sum with the above lemma, we obtain

$$\sum_{t=1}^T \Delta_{A(t)}(\mathbb{1}\{G_t\} + \mathbb{1}\{H_t\}) \leq \frac{16(1+\epsilon) \log T}{\kappa_L^2} \underbrace{\left( \frac{\left( \sum_{s=1}^L \kappa_s \right)^2}{l} + \left( \sum_{s=1}^l \kappa_s \right)^2 \right)}_{C(l; \kappa)} \left( \frac{L}{\Delta_{A_2}} + \sum_{k \notin \alpha^*} \frac{1}{\kappa_L(\theta_L - \theta_k)} \right).$$

This bound can be optimized by minimizing  $C(l; \kappa)$  over  $l$ .

## E Regret analysis for PBM-PIE (Theorem 11)

The proof follows the decomposition of [6]. For all  $t \geq 1$ , we denote  $f(t, \epsilon) = (1 + \epsilon) \log t$ .

### E.1 Controlling leaders and estimations

Define  $\eta_0 = \min_{k \in \{1, \dots, L-1\}} (\theta_k - \theta_{k+1})/2$  and let  $\eta < \eta_0$ . We define the following set of rounds

$$A = \{t \geq 1 : \mathcal{L}(t) \neq (1, \dots, L)\}.$$

Our goal is to upper bound the expected size of  $A$ . Let us introduce the following sets of rounds:

$$\begin{aligned} B &= \{t \geq 1 : \exists k \in \mathcal{L}(t), |\hat{\theta}_k(t) - \theta_k| \geq \eta\}, \\ C &= \{t \geq 1 : \exists k \leq L, U_k(t) \leq \theta_k\}, \\ D &= \{t \geq 1 : t \in A \setminus (B \cup C), \exists k \leq L, k \notin \mathcal{L}(t), |\hat{\theta}_k(t) - \theta_k| \geq \eta\}. \end{aligned}$$

We first show that  $A \subset (B \cup C \cup D)$ . Let  $t \in A \setminus (B \cup C)$ . Let  $k, k' \in \mathcal{L}(t)$  such that  $k < k'$ . Since  $t \notin B$ , we have that  $|\hat{\theta}_k(t) - \theta_k| \leq \eta$  and  $|\hat{\theta}_{k'}(t) - \theta_{k'}| \leq \eta$ . Since  $\eta \leq (\theta_k - \theta_{k'})/2$ , we conclude that  $\hat{\theta}_k(t) \geq \hat{\theta}_{k'}(t)$ . This proves that  $(\mathcal{L}_1(t), \dots, \mathcal{L}_L(t))$  is an increasing sequence. We have that  $\mathcal{L}_L(t) > L$  otherwise  $\mathcal{L}(t) = (1, \dots, L)$  which is a contradiction because  $t \in A$ . Since  $\mathcal{L}_L(t) > L$ , there exists  $k \leq L$  such that  $k \notin \mathcal{L}(t)$ . We show by contradiction that  $|\hat{\theta}_k(t) - \theta_k| \geq \eta$ . Assume that  $|\hat{\theta}_k(t) - \theta_k| \leq \eta$ . We also have that  $\hat{\theta}_{\mathcal{L}_L(t)}(t) - \theta_{\mathcal{L}_L(t)} \leq \eta$  because  $\mathcal{L}_L(t) \in \mathcal{L}(t)$  and  $t \notin B$ . Thus,  $\hat{\theta}_k(t) > \hat{\theta}_{\mathcal{L}_L(t)}(t)$ . We have a contradiction because this would imply that  $k \in \mathcal{L}(t)$ . Finally we have proven that if  $t \in A \setminus (B \cup C)$ , then  $t \in D$  so  $A \subset (B \cup C \cup D)$ .

By a union bound, we obtain

$$\mathbb{E}[|A|] \leq [|B|] + [|C|] + [|D|].$$

In the following, we upper bound each set of rounds individually.

**Controlling  $\mathbb{E}[|B|]$ :** We decompose  $B = \bigcup_{k=1}^K (B_{k,1} \cup B_{k,2})$  where

$$\begin{aligned} B_{k,1} &= \{t \geq 1 : k \in \mathcal{L}(t), \mathcal{L}_L(t) \neq k, |\hat{\theta}_k(t) - \theta_k| \geq \eta\} \\ B_{k,2} &= \{t \geq 1 : k \in \mathcal{L}(t), \mathcal{L}_L(t) = k, |\hat{\theta}_k(t) - \theta_k| \geq \eta\} \end{aligned}$$

Let  $t \in B_{k,1}$ :  $k \in A(t)$  so  $\mathbb{E}[k \in A(t) | t \in B_{k,1}] = 1$ . Furthermore, for all  $t$ ,  $\mathbb{1}\{t \in B_{k,1}\}$  is  $\mathcal{F}_{t-1}$  measurable. Then we can apply Lemma 22 (with  $H = B_{k,1}$  and  $c = 1$ ).

$$\mathbb{E}[|B_{k,1}|] \leq 2(2 + \kappa_L^{-2} \eta^{-2}).$$

Let  $t \in B_{k,2}$ :  $k \in \mathcal{B}(t)$  but because of the randomization of the algorithm,  $k \in A(t)$  with probability  $1/2$ , i.e.  $\mathbb{E}[k \in A(t) | t \in B_{k,2}] \geq 1/2$ . We get

$$\mathbb{E}[|B_{k,2}|] \leq 4(4 + \kappa_L^{-2} \eta^{-2})$$

By union bound over  $k$ , we get  $\mathbb{E}[|B|] \leq 2K(10 + 3\kappa_L^{-2} \eta^{-2})$ .

**Controlling  $\mathbb{E}[|C|]$ :** We decompose  $C = \bigcup_{k=1}^L C_k$  where  $C_k = \{t \geq 1 : U_k(t) \leq \theta_k\}$

We first require to prove Proposition 10.

*Proof.* Theorem 2 of [17] implies that

$$\mathbb{P}\left(\sum_{l=1}^L N_{k,l}(t) d\left(\frac{S_{k,l}(t)}{N_{k,l}(t)}, \kappa_l \theta_k\right) \geq \delta\right) \leq e^{-\delta} \left(\frac{\lceil \delta \log(t) \rceil \delta}{L}\right)^L e^{L+1}.$$

The function  $\Phi : x \rightarrow \sum_{l=1}^L N_{k,l}(t) d\left(\frac{S_{k,l}(t)}{N_{k,l}(t)}, \kappa_l x\right)$  is convex and non-decreasing on  $[\theta_k^{\min}(t), 1]$ ; the convexity is easily checked and  $\theta_k^{\min}(t)$  is defined as the minimum of this convex function. By definition, we have, either,  $U_k(t, \delta) = 1$  and then  $U_k(t, \delta) > \theta_k$ , or,  $U_k(t, \delta) < 1$  and  $\Phi(U_k(t, \delta)) = \delta$ , consequently

$$\mathbb{P}(U_k(t, \delta) < \theta_k) = \mathbb{P}(\Phi(U_k(t, \delta)) \leq \Phi(\theta_k)) = \mathbb{P}(\delta \leq \Phi(\theta_k)).$$

□

Remember that  $U_k(t) = U_k(t, (1 + \epsilon) \log(t)) = U_k(t, f(t, \epsilon))$ . Thus, applying Proposition 10, we obtain for arm  $k$ ,

$$\mathbb{E}[|C_k|] \leq \sum_{t=1}^{\infty} \mathbb{P}(U_k(t) \leq \theta_k) \leq \lceil e^{L+1} \rceil + \frac{e^{L+1}}{L^L} \sum_{t=\lceil e^{L+1} \rceil + 1}^{\infty} \frac{(2 + \epsilon)^{2L} (\log t)^{3L}}{t^{1+\epsilon}} \leq C_3(\epsilon),$$

for some constant  $C_3(\epsilon)$ .

**Controlling  $\mathbb{E}[|D|]$ :** Decompose  $D$  as  $D = \bigcup_{k=1}^L D_k$  where

$$D_k = \{t \geq 1 : t \in A \setminus (B \cup C), k \notin \mathcal{L}(t), |\hat{\theta}_k(t) - \theta_k| \geq \eta\}.$$

For a given  $k \leq L$ ,  $D_k$  is the set of rounds at which  $k$  is not one of the leaders, and is not accurately estimated. Let  $t \in D_k$ . Since  $k \notin \mathcal{L}(t)$ , we must have  $|\mathcal{L}_L(t)| > L$ . In turn, since  $t \notin B$ , we have  $|\hat{\theta}_{\mathcal{L}_L(t)}(t) - \theta_{\mathcal{L}_L(t)}| \leq \eta$ , so that

$$\hat{\theta}_{\mathcal{L}_L(t)} \leq \theta_{\mathcal{L}_L(t)} + \eta \leq \theta_L + \eta \leq (\theta_L + \theta_{L+1})/2.$$

Furthermore, since  $t \notin C$  and  $1 \leq k \leq L$ , we have  $U_k(t) \geq \theta_k \geq \theta_L \geq (\theta_L + \theta_{L+1})/2 \geq \hat{\theta}_{\mathcal{L}_L(t)}$ . This implies that  $k \in \mathcal{B}(t)$  thus  $\mathbb{E}[k \in A(t) | t \in D_k] \geq 1/(2K)$ . We apply Lemma 22 with  $H \equiv D_k$  and  $c = 1/(2K)$  to get

$$\mathbb{E}[|D|] \leq \sum_{k=1}^L \mathbb{E}[|D_k|] \leq 4K(4K + \kappa_L^{-2} \eta^{-2}).$$

## E.2 Regret decomposition

We decompose the regret by distinguishing rounds in  $A \cup B$  and other rounds. More specifically, we introduce the following sets of rounds for arm  $k > L$ :

$$E_k = \{t \geq 1 : t \notin (B \cup C \cup D), \mathcal{L}(t) = a^*, A(t) = v_{k,L}\}.$$

The set of instants at which a suboptimal action is selected now can be expressed as follows

$$\{t \geq 1 : A(t) \neq a^*\} \subset (B \cup C \cup D) \cup (\bigcup_{k=L+1}^K E_k).$$

Using a union bound, we obtain the upper bound

$$\mathbb{E}[R(T)] \leq \left(\sum_{l=1}^L \kappa_l\right) \mathbb{E}[|B \cup C \cup D|] + \sum_{k=L+1}^K \Delta_{v_{k,L}}(\theta) \mathbb{E}[|E_k|].$$

From previous boundaries, putting it all together, there exist  $C_1(\eta)$  and  $C_3(\epsilon)$ , such that

$$\left(\sum_{l=1}^L \kappa_l\right) (\mathbb{E}[|B|] + \mathbb{E}[|C|] + \mathbb{E}[|D|]) \leq C_1(\eta) + C_3(\epsilon).$$

At this step, it suffices to bound events  $E_k$  for all  $k > L$ .



### E.3 Bounding event $E_k$

We proceed similarly to [10]. Let us fix an arm  $k > L$ . Let  $t \in E_k$ : arm  $k$  is pulled in position  $L$ , so by construction of the algorithm, we have that  $k \in \mathcal{B}(t)$  and thus  $U_k(t) \geq \hat{\theta}_{\mathcal{L}_L(t)}(t)$ . We first show that this implies that  $U_k(t) \geq \theta_L - \eta$ . Since  $t \in E_k$ , we know that  $\mathcal{L}_L(t) = L$ , and since  $t \notin B$ ,  $|\hat{\theta}_L(t) - \theta_L| \leq \eta$ . This leads to

$$U_k(t) \geq \hat{\theta}_{\mathcal{L}_L(t)}(t) = \hat{\theta}_L(t) \geq \theta_L - \eta.$$

Recall that  $N_{k,L}(t)$  is the number of times arm  $k$  was played in position  $L$ . By denoting  $d^+(x, y) = \mathbb{1}\{x < y\}d(x, y)$ , we have that

$$\begin{aligned} N_{k,L}(t)d^+(S_{k,L}(t)/N_{k,L}(t), \kappa_L(\theta_L - \eta)) &\leq N_{k,L}(t)d^+(S_{k,L}(t)/N_{k,L}(t), \kappa_L U_k(t)) \\ &\leq \sum_{l=1}^L N_{k,l}(t)d^+(S_{k,l}(t)/N_{k,l}(t), \kappa_l U_k(t)) \leq f(t, \epsilon). \end{aligned}$$

This implies that  $\mathbb{1}\{t \in E_k\} \leq \mathbb{1}\{N_{k,L}(t)d^+(S_{k,L}(t)/N_{k,L}(t), \kappa_L(\theta_L - \eta)) \leq f(t, \epsilon)\}$ .

**Lemma 19.** ([10], Lemma 7) Denoting by  $\hat{\nu}_{k,s}^L$  the empirical mean of the first  $s$  samples of  $Z_{k,L}$ , we have

$$\begin{aligned} \sum_{t=1}^T \mathbb{1}\{A(t) = v_{k,L}, N_{k,L}(t)d^+(S_{k,L}(t)/N_{k,L}(t), \kappa_L(\theta_L - \eta)) \leq f(t, \epsilon)\} \\ \leq \sum_{s=1}^T \mathbb{1}\{sd^+(\hat{\nu}_{k,s}^L, \kappa_L(\theta_L - \eta)) \leq f(T, \epsilon)\}. \end{aligned}$$

We apply Lemma 19 which is a direct translation of Lemma 7 from [10] to our problem. This yields

$$|E_k| \leq \sum_{s=1}^T \mathbb{1}\{sd^+(\hat{\nu}_{k,s}^L, \kappa_L(\theta_L - \eta)) \leq f(T, \epsilon)\}.$$

Let  $\gamma > 0$ . We define  $K_T = \frac{(1+\gamma)f(T, \epsilon)}{d^+(\kappa_L \theta_k, \kappa_L(\theta_L - \eta))}$ . We now rewrite the last inequality splitting the sum in two parts.

$$\begin{aligned} \sum_{s=1}^T \mathbb{P}(sd^+(\hat{\nu}_{k,s}^L, \kappa_L(\theta_L - \eta)) \leq f(T, \epsilon)) &\leq K_T + \sum_{s=K_T+1}^{\infty} \mathbb{P}(K_T d^+(\hat{\nu}_{k,s}^L, \kappa_L(\theta_L - \eta)) \leq f(T, \epsilon)) \\ &\leq K_T + \sum_{s=K_T+1}^{\infty} \mathbb{P}(d^+(\hat{\nu}_{k,s}^L, \kappa_L(\theta_L - \eta)) \leq d(\kappa_L \theta_k, \kappa_L(\theta_L - \eta))/(1+\gamma)) \\ &\leq K_T + \frac{C_2(\gamma, \eta)}{T^{\beta(\gamma, \eta)}}, \end{aligned}$$

where last inequality comes from Lemma 20. Fixing  $\gamma < \epsilon$ , we obtain the desired result, which concludes the proof.

**Lemma 20.** For each  $\gamma > 0$ , there exists  $C_2(\gamma, \eta) > 0$  and  $\beta(\gamma, \eta) > 0$  such that

$$\sum_{s=K_T+1}^{\infty} \mathbb{P}\left(d^+(\hat{\nu}_{k,s}^L, \kappa_L(\theta_L - \eta)) \leq \frac{d(\kappa_L \theta_k, \kappa_L(\theta_L - \eta))}{1+\gamma}\right) \leq \frac{C_2(\gamma, \eta)}{T^{\beta(\gamma, \eta)}}.$$

*Proof.* If  $d^+(\hat{\nu}_{k,s}^L, \kappa_L(\theta_L - \eta)) \leq \frac{d(\kappa_L \theta_k, \kappa_L(\theta_L - \eta))}{1+\gamma}$ , then there exists some  $r(\gamma, \eta) \in (\theta_k, \theta_L - \eta)$  such that  $\hat{\nu}_{k,s}^L > \kappa_L r(\gamma, \eta)$  and

$$d(\kappa_L r(\gamma, \eta), \kappa_L(\theta_L - \eta)) = \frac{d(\kappa_L \theta_k, \kappa_L(\theta_L - \eta))}{1+\gamma}.$$

Hence,

$$\begin{aligned} \mathbb{P}\left(d^+(\hat{\nu}_{k,s}, \kappa_L \theta_L) < \frac{d(\kappa_L \theta_k, \kappa_L \theta_L)}{1 + \gamma}\right) &\leq \mathbb{P}(d(\hat{\nu}_{k,s}, \kappa_L \theta_k) > d(\kappa_L r(\gamma, \eta), \kappa_L \theta_k), \hat{\nu}_{k,s} > \kappa_L \theta_k) \\ &\leq \mathbb{P}(\hat{\nu}_{k,s} > \kappa_L r(\gamma, \eta)) \leq \exp(-sd(\kappa_L r(\gamma, \eta), \kappa_L \theta_k)). \end{aligned}$$

We obtain,

$$\sum_{t=K_T}^{\infty} \mathbb{P}\left(d^+(\hat{\nu}_{k,s}, \kappa_L \theta_L) < \frac{d(\kappa_L \theta_k, \kappa_L \theta_L)}{1 + \gamma}\right) \leq \frac{\exp(-K_T d(\kappa_L r(\gamma, \eta), \kappa_L \theta_k))}{1 - \exp(-d(\kappa_L r(\gamma, \eta), \kappa_L \theta_k))} \leq \frac{C_2(\gamma, \eta)}{T^{\beta(\gamma, \eta)}},$$

for well chosen  $C_2(\gamma, \eta)$  and  $\beta(\gamma, \eta)$ .  $\square$

## F Lemmas

In this section, we recall two necessary concentration lemmas directly adapted from Lemma 4 and 5 in Appendix A of [6]. Although more involved from a probabilistic point of view, these results are simpler to establish than proposition 8 as their adaptation to the case of the PBM relies on a crude lower bound for  $\tilde{N}_k(t)$ , which is sufficient for proving Theorem 11..

**Lemma 21.** *For  $k \in \{1, \dots, K\}$  consider the martingale  $M_{k,n} = \sum_{i=1}^n \bar{Z}_{k,i}$ , where  $\bar{Z}_{k,i}$  is defined in (15). Consider  $\Phi$  a stopping time such that either  $N_k(\Phi) \geq s$  or  $\Phi = T + 1$ . Then*

$$\mathbb{P}[|M_{k,N_k(\Phi)}| \geq N_k(\Phi)\eta, N_k(\Phi) \geq s] \leq 2\exp(-2s\eta^2). \quad (16)$$

As a consequence,

$$\mathbb{P}[|\hat{\theta}_k(\Phi) - \theta_k| \geq \eta, \Phi \leq T] \leq 2\exp(-2s\kappa_L^2\eta^2). \quad (17)$$

*Proof.* The first result is a direct application of Lemma 4 of [6] as  $(Z_l(t))_t$  with  $Z_l(t) = X_l(t)Y_l(t)$  is an independent sequence of  $[0, 1]$ -valued variables.

For the second inequality, we use the fact that  $\tilde{N}_k(t) \geq \kappa_L N_k(t)$ . Hence,

$$\mathbb{P}[|\hat{\theta}_k(\Phi) - \theta_k| \geq \eta, \Phi \leq T] \leq \mathbb{P}\left[\frac{|M_{k,N_k(\Phi)}|}{\kappa_L N_k(\Phi)} \geq \eta, \Phi \leq T\right].$$

which is upper bounded using (16).  $\square$

**Lemma 22.** *Fix  $c > 0$  and  $k \in \{1, \dots, K\}$ . Consider a random set of rounds  $H \subset \mathbb{N}$ , such that, for all  $t$ ,  $\mathbb{1}\{t \in H\}$  is  $\mathcal{F}_{t-1}$  measurable and such that for all  $t \in H$ ,  $\{k \in \mathcal{B}(t)\}$  is true. Further assume, for all  $t$ , one has  $\mathbb{E}[\mathbb{1}\{k \in A(t)\} | t \in H] \geq c > 0$ . We define  $\tau_s$  a stopping time such that  $\sum_{t=1}^{\tau_s} \mathbb{1}\{t \in H\} \geq s$ . Consider the random set  $\Lambda = \{\tau_s : s \geq 1\}$ . Then, for all  $k$ ,*

$$\sum_{t \geq 0} \mathbb{P}[t \in \Lambda, |\hat{\theta}_k(t) - \theta_k| \geq \eta] \leq 2c^{-1}(2c^{-1} + \kappa_L^{-2}\eta^{-2})$$

The proof of this lemma follows that of Lemma 5 in [6] using the same lower bound for  $\tilde{N}_k(t)$  as above.
